# Supplementary material
Source: PubMed Central journal article supplement (PMC4959066)
Supplement: AEM.03860-15_zam999117138so1.pdf [file AEM.03860-15_zam999117138so1.pdf]

## Supplementary Tables

| Strains and plasmids      | Description                                                                                            | References |
|---------------------------|--------------------------------------------------------------------------------------------------------|------------|
| <i>M. gryphiswaldense</i> |                                                                                                        |            |
| strains                   |                                                                                                        |            |
| <b>MSR-1 R3/S1</b>        | Rif <sup>R</sup> Sm <sup>R</sup> , spontaneous mutant                                                  | (1)        |
| <b>MSR-1B</b>             | R3/S1 Spontaneous mutant,<br>lacking 40,385 kb genomic<br>region                                       | (2)        |
| <b>IK-1</b>               | R3/S1 $\Delta recA$                                                                                    | (3)        |
| <b>2xGFDCop</b>           | one native and one further copy<br>of the <i>mamGFDC</i> operon, Km <sup>R</sup>                       | This study |
| <b>2xmms6op</b>           | one native and one further copy<br>of the <i>mms6</i> operon, Km <sup>R</sup>                          | This study |
| <b>2xmms6op+2xGFDC</b>    | one native and one further copy<br>of the <i>mms6</i> and <i>mamGFDC</i><br>operon, Km <sup>R</sup>    | This study |
| <b>3xmms6op</b>           | one native and two further copies<br>of the <i>mms6</i> operon, Km <sup>R</sup>                        | This study |
| <b>4xmms6op/Gm</b>        | one native and three further<br>copies of the <i>mms6</i> operon, Km <sup>R</sup> ,<br>Gm <sup>R</sup> | This study |

|                              |                                                                                                                                  |                                   |
|------------------------------|----------------------------------------------------------------------------------------------------------------------------------|-----------------------------------|
| <b>4xmms6op</b>              | one native and three further copies of the <i>mms6</i> operon, Km <sup>R</sup> , Gm <sup>S</sup>                                 | This study                        |
| <b>5xmms6op</b>              | one native and five copies of the <i>mms6</i> operon, Km <sup>R</sup> , Gm <sup>S</sup>                                          | This study                        |
| <b>2xmamABop</b>             | one native and one further copy of the <i>mamAB</i> operon, Km <sup>R</sup>                                                      | This study                        |
| <b>3xmamABop</b>             | one native and two copies of the <i>mamAB</i> operon, Km <sup>R</sup> , Gm <sup>R</sup>                                          | This study                        |
| <b>2xABG6X</b>               | ΔRecA with one further copy of the <i>mamAB</i> , <i>mamGFDC</i> , <i>mms6</i> operon and <i>mamXYZ</i> genes                    | This study                        |
| <b>ABG6X+feo</b>             | ΔRecA with two copies of the <i>mamAB</i> , <i>mamGFDC</i> , <i>mms6</i> operon and <i>mamXYZ</i> genes and <i>feoAB1</i> operon | This study                        |
| <b><i>E. coli</i> strain</b> |                                                                                                                                  |                                   |
| <b>BW29427</b>               | <i>thrB1004 pro thi rpsL hsdS lacZDM15 RP4-1360D(araBAD)567DdapA::[erm pir]</i>                                                  | Datsenko and Wanner (unpublished) |
| <b>DH5α</b>                  | <i>1341::[erm</i>                                                                                                                | Invitrogen                        |

|                                     |                                                                                                                                                                                                                                                   |                                                                   |
|-------------------------------------|---------------------------------------------------------------------------------------------------------------------------------------------------------------------------------------------------------------------------------------------------|-------------------------------------------------------------------|
|                                     | <i>pir(wildtype)]trahsdR17 recA1-<br/>endA1gyrA96thi-1relA1</i>                                                                                                                                                                                   |                                                                   |
| <b>DH10<math>\beta</math></b>       | <i>F' endA1 recA1 galE15 galK16<br/>nupG rpsL <math>\Delta</math>lacX74<br/><math>\Phi</math>80lacZ<math>\Delta</math>M15 araD139<br/><math>\Delta</math>(ara,leu)7697 mcrA <math>\Delta</math>(mrr-<br/>hsdRMS-mcrBC) <math>\lambda^-</math></i> | Invitrogen                                                        |
| <b>S17-1<math>\lambda</math>pir</b> | RPA-2, Tc::Mu-Km::Tn7 ( $\lambda$ pir)                                                                                                                                                                                                            | (4)                                                               |
| <b>WM3064</b>                       | <i>thrB1004 pro thi rpsL hsdS<br/>lacZDM15 RP4-1360D(araBAD)<br/>567DdapA::[erm pir]</i>                                                                                                                                                          | W. Metcalf, kindly<br>provided by J.<br>Gescher, KIT<br>Karlsruhe |
| <b>Plasmids</b>                     |                                                                                                                                                                                                                                                   |                                                                   |
| <b>pJet1.2</b>                      | Ap <sup>r</sup> , <i>eco47IR</i> , <i>rep</i> (pMB-1)                                                                                                                                                                                             | Fermentas                                                         |
| <b>pCM157</b>                       | Tet <sup>R</sup> , Cre expression vector                                                                                                                                                                                                          | (5)                                                               |
| <b>pBBR-MCS5</b>                    | Gm <sup>r</sup> , <i>lacZ<math>\alpha</math></i>                                                                                                                                                                                                  | (2)                                                               |
| <b>pBam-1</b>                       | <i>oriR6K</i> , Km <sup>R</sup> , Ap <sup>R</sup>                                                                                                                                                                                                 | (6)                                                               |
| <b>pTps_AB</b>                      | Km <sup>R</sup> , BSD <sup>R</sup> , mariner tps vector<br>containing <i>mamAB</i> operon                                                                                                                                                         | (7)                                                               |
| <b>Gm- pTps_AB</b>                  | Gm <sup>R</sup> , BSD <sup>R</sup> , mariner tps vector<br>containing <i>mamAB</i> operon                                                                                                                                                         | This study                                                        |

|                        |                                                                                                                                             |            |
|------------------------|---------------------------------------------------------------------------------------------------------------------------------------------|------------|
| <b>pTps_ABG6</b>       | Cm <sup>R</sup> , Km <sup>R</sup> , BSD <sup>R</sup> , mariner tps<br>vector with <i>mamAB</i> , <i>mamGFDC</i> ,<br>and <i>mms6</i> operon | (7)        |
| <b>pTps_XYZ</b>        | Gm <sup>R</sup> , BSD <sup>R</sup> , mariner Tps vector<br>with <i>mamY</i> , <i>mamX</i> and <i>mamZ</i>                                   | (7)        |
| <b>Tet-pBam_feoAB1</b> | Tc <sup>R</sup> , Ap <sup>R</sup> , <i>feoAB1</i> operon under<br>the control of P <sub><i>mamH</i></sub> , Tn5 vector                      | (7)        |
| <b>pBam_mamGFDC</b>    | pBam-1, <i>mamGFDC</i> operon                                                                                                               | This study |
| <b>pBam_mms6 1x</b>    | pBam-1, <i>mms6</i> operon                                                                                                                  | This study |
| <b>pBam_GFDC/mms6</b>  | pBam_mamGFDC, <i>mms6</i> operon                                                                                                            | This study |
| <b>pBam_mms6 2x</b>    | pBam_mms6 1x , <i>mms6</i> operon<br><br>(two <i>mms6</i> operons)                                                                          | This study |
| <b>pBam_GFDC/Gm</b>    | pBam_mamGFDC,<br><br><i>lox71_Gm<sup>r</sup>_lox66</i>                                                                                      | This study |
| <b>pBam_mms6/Gm</b>    | pBam_mms6 1x,<br><br><i>lox71_Gm<sup>r</sup>_lox66</i>                                                                                      | This study |

---

**Supplementary Table S1:** Strains and plasmids used in this study.

| Strain                 | Revealed insertion site/s of operon copies (gene name) | Predicted name or function of the encoded protein                                                                          |
|------------------------|--------------------------------------------------------|----------------------------------------------------------------------------------------------------------------------------|
| <b>2xGFDCop</b>        | <i>amb3829</i> homolog                                 | Flagellar protein FlbT                                                                                                     |
| <b>2xmms6op</b>        | <i>mgr0892</i>                                         | Hemolysin<br>activation/secretion protein                                                                                  |
| <b>2xmms6op+2xGFDC</b> | <i>mgr2596</i>                                         | Nitrilase/cyanide hydratase<br>and apolipoprotein N-acyltransferase                                                        |
| <b>3xmms6op</b>        | <i>mgr1078</i>                                         | AMP fatty acid ligase                                                                                                      |
| <b>4xmms6op</b>        | <i>mgr1078</i><br><i>mgr3739</i>                       | AMP fatty acid ligase;<br>TerC-like integral<br>membrane protein                                                           |
| <b>5xmms6op</b>        | <i>mgr1078</i><br><i>mgr3739</i><br><i>mgr1637</i>     | AMP fatty acid ligase;<br>TerC-like integral<br>membrane protein;<br>Methyl-accepting<br>chemotaxis protein                |
| <b>2xmamABop</b>       | <i>mgr2709</i>                                         | molecular chaperone<br>distantly related to HSP70-<br>fold metalloproteases                                                |
| <b>3xmamABop</b>       | <i>mgr2709</i><br><i>mgr3096</i>                       | Molecular chaperone<br>distantly related to HSP70-<br>fold metalloproteases;<br>NADPH-dependent<br>glutamate synthase beta |

|                        |                |                                      |
|------------------------|----------------|--------------------------------------|
|                        |                | chain and related<br>oxidoreductases |
| <b>2xABG6Xop</b>       | <i>mgr2922</i> | Hypothetical protein;                |
|                        | <i>mgr0484</i> | Hypothetical protein                 |
| <b>2xABG6Xop+2xfeo</b> | <i>mgr2922</i> | Hypothetical protein;                |
|                        | <i>mgr0484</i> | Hypothetical protein;                |
|                        | <i>mgr2581</i> | Membrane or secreted<br>protein      |

---

**Supplementary Table S2:** Transposon insertion sites in generated overexpression strains identified by genome sequencing.

## Supplementary Figures

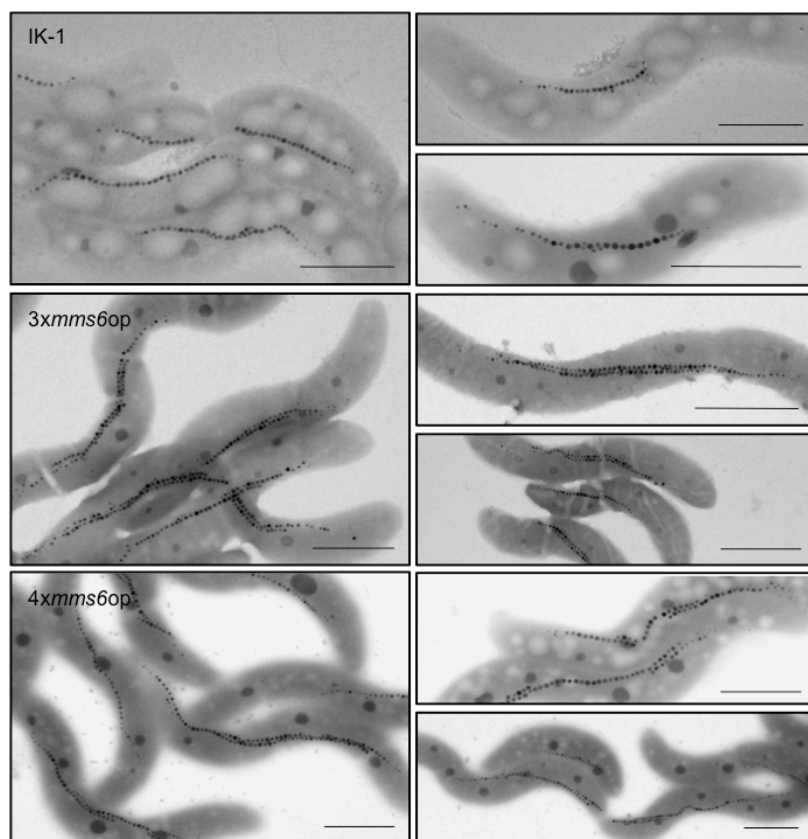

**Figure S1.** Transmission electron micrographs of mutants *3xmms6op* and *4xmms6op* compared to IK-1. Scale bar = 1 μm.

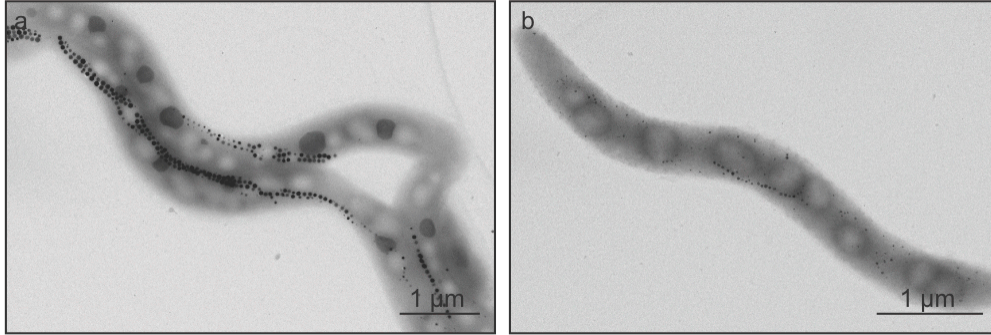

**Figure S2.** Transmission electron micrographs of *2xmamABop*, illustrating the phenotypic heterogeneity of magnetosome formation found in this mutant. **(a)** Cell with increased numbers of regular-sized magnetosomes. **(b)** Cell with increased number of magnetosomes with aberrant crystal sizes and intracellular localization.



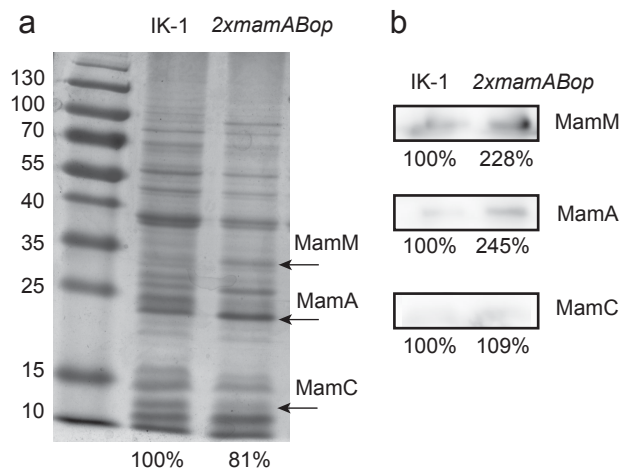

**Figure S3.** Proteomic analysis of magnetosomes from *2xmamABop*. **(a)** 1D SDS-PAGE of Coomassie blue stained proteins, which were solubilized from isolated magnetosome particles of IK-1 and *2xmamABop*. Bands of size of MamM (34 kDa), MamA (24 kDa) and MamC (12 kDa) are indicated (arrows). **(b)** Immunodetection of MamM, MamA and MamC in blotted magnetosome membrane fractions from IK-1 and *2xmamABop*. Respective protein bands of strain IK-1 were assigned to 100%.

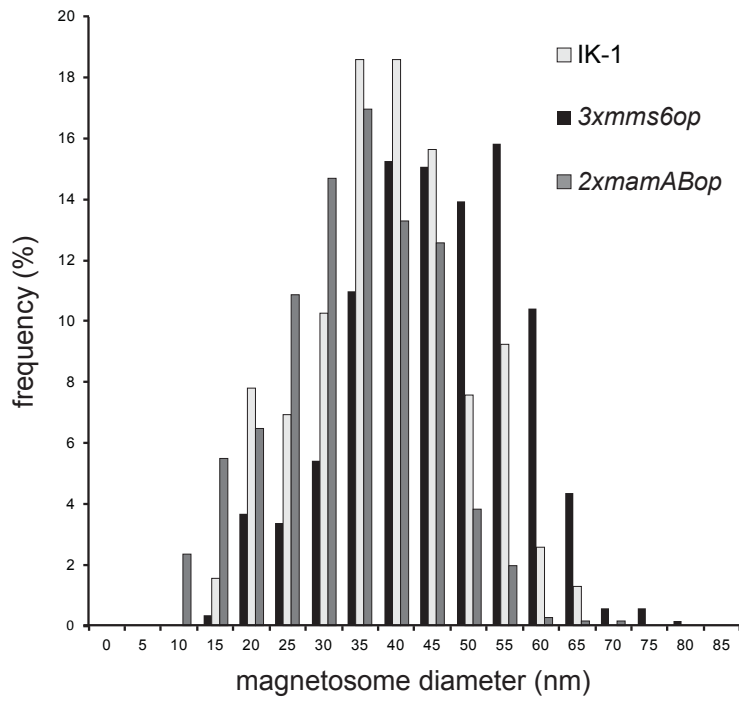

**Figure S4.** Magnetosome size distributions of the insertion mutant *3xms6op*, *2xABG6Xop* and the parental strain IK-1.

## Supplementary References

1. **Schultheiss D, Schüler D.** 2003. Development of a genetic system for *Magnetospirillum gryphiswaldense*. Arch Microbiol **179**:89-94.
2. **Kovach ME, Elzer PH, Hill DS, Robertson GT, Farris MA, Roop RM, 2nd, Peterson KM.** 1995. Four new derivatives of the broad-host-range cloning vector pBBR1MCS, carrying different antibiotic-resistance cassettes. Gene **166**:175-176.
3. **Kolinko I, Jogler C, Katzmann E, Schüler D.** 2011. Frequent mutations within the genomic magnetosome island of *Magnetospirillum gryphiswaldense* are mediated by RecA. J Bacteriol **193**:5328-5334.
4. **Simon R, Priefer U, Puhler A.** 1983. A Broad Host Range Mobilization System for In Vivo Genetic Engineering: Transposon Mutagenesis in Gram Negative Bacteria. Nature Biotech **1**:784-791.
5. **Marx CJ, Lidstrom ME.** 2002. Broad-host-range cre-lox system for antibiotic marker recycling in gram-negative bacteria. Biotechniques **33**:1062-1067.
6. **Martinez-Garcia E, Calles B, Arevalo-Rodriguez M, de Lorenzo V.** 2011. pBAM1: an all-synthetic genetic tool for analysis and construction of complex bacterial phenotypes. BMC Microbiol **11**:38.
7. **Kolinko I, Lohsse A, Borg S, Raschdorf O, Jogler C, Tu Q, Posfai M, Tompa E, Plitzko JM, Brachmann A, Wanner G, Müller R, Zhang Y, Schüler D.** 2014. Biosynthesis of magnetic nanostructures in a foreign

organism by transfer of bacterial magnetosome gene clusters. *Nature Nanotech* **9**:193-197.
